# Supplementary material
Source: publisher figshare collection journal article supplement (https://karger.figshare.com/ndownloader/files/37511071)
Supplement: Supplementary file 1 [file 37511071]

**Supplementary Table: Disease status and medications used in patients with schizophrenia**

| **Patient** | **Disease status** | **Duration of the disease** | **Treatment** |
| --- | --- | --- | --- |
| P1 | Chronic | 4 | Risperidone+ Biperiden+ Sodium valproate + Clonazepam+ Aripiprazole+ Carbamazepine+ Olanzapine |
| P2 | Chronic | 5 | Risperidone+ Trihexyphenidyl + Clonazepam + Quetiapine |
| P3 | Chronic | 5 | Risperidone+ Biperiden+ Sodium valproate +Carbamazepine+ Carbamazepine |
| P4 | Chronic | 6 | Sodium valproate+ Risperidone+ Haloperidol+ Carbamazepine |
| P5 | Chronic | 18 | Risperidone+ Biperiden+ Sodium valproate + Haloperidol+ Clonazepam+ Clonazepam + Chlordiazepoxide |
| P6 | Chronic | 4 | Risperidone+ Biperiden+ Propranolol + Haloperidol+ Aripiprazole + Trihexyphenidyl |
| P7 | Chronic | 10 | Flupentixol + Biperiden+ Sodium valproate + Clonazepam |
| P8 | Chronic | 10 | Haloperidol + Biperiden+ Sodium valproate + Olanzapine + Citalopram |
| P9 | Chronic | 5 | Risperidone+ Biperiden+ Sodium valproate + Propranolol + Gabapentin |
| P10 | Chronic | 19 | Biperiden+ Clozapine + Sodium valproate+ Clonazepam+ Citalopram + Haloperidol + Olanzapine |
| P11 | Chronic | 4 | Risperidone+ Biperiden+ Aripiprazole + Clonazepam+ Haloperidol + Carbamazepine+ Trihexyphenidyl+ Bisacodyl |
| P12 | Chronic | 4 | Olanzapine + Clonazepam+ Cyproterone Acetate + Trihexyphenidyl + Sertraline +Aripiprazole +Haloperidol |
| P13 | Chronic | 5 | Risperidone + Clonazepam + Carbamazepine + Biperiden + Propranolol+ Olanzapine+ Haloperidol +Hydrocortisone |
| P14 | Chronic | 10 | Aripiprazole + Clozpine + Haloperidol +Biperiden |
| P15 | Chronic | 14 | Risperidone + Lorazepam + Chlorpromazine +Trihexyphenidyl+ Cyproterone Acetate + Trifluoperazine+ Haloperidol + Biperiden |
| P16 | Chronic | 14 | Risperidone + Sertraline + Aripiprazole +Olanzapine + Levothyroxine + Biperiden +Trifluoperazine + Trihexyphenidyl |
| P17 | Chronic | 9 | Propranolol + Gabapentin + Tranqopine + Folate |
| P18 | Chronic | 5 | Aripiprazole + Sertraline + Lorazepam + Haloperidol + Biperiden |
| P19 | Chronic | 12 | Aripiprazole + Clozpine + Biperiden + Rahakin + Olanzapine + Promethazine + Haloperidol + Clonidine |
| P20 | Chronic | 12 | Biperiden + Risperidone + Olanzapine + Tranqopine + Clonazepam +  Rahakin +Chlorpromazine |
| P21 | Chronic | 8 | Sodium valproate + Lorazepam + Olanzapine + Carbamazepine +Diazepam |
| P22 | Chronic | 12 | Haloperidol + Sodium Valprovate + Promethazine + Biperiden + Carbamazepine + Chlorpromazin + Propranolo |
| P23 | Chronic | 7 | Haloperidol + Risperidone + Carbamazepine + Clonazepam + Clomipramine +Famotidine |
| P24 | Chronic | 12 | Haloperidol + Risperidone + Diazepam+ Clobazam + Propranolol + Citalopram |
| P25 | Chronic | 10 | Haloperidol + Sodium Valprovate + Olanzapine + Carbamazepine +  Diazepam+ Phenytoin |
| P26 | Chronic | 8 | Haloperidol + Risperidone + Carbamazepine + Olanzapine |
| P27 | Chronic | 11 | Haloperidol + Carbamazepine + Olanzapine + Nortrilen + Clonazepam |
| P28 | Chronic | 7 | Haloperidol + Quetiapine + Clonazepam +Chlorpromazine |
| P29 | Chronic | 5 | Sodium Valproate + Carbamazepine + Oxazepam + Olanzapine +Imipramine |
| P30 | Chronic | 4 | Carbamazepine + Biperiden + Phenytoin + Levothyroxine |
| P31 | Chronic | 11 | Sodium valproate + Olanzapine + Imipramine + Clonazepam |
| P32 | Chronic | 9 | Risperidone + Clonazepam + Citalopram + Nortrilen |
| P33 | Chronic | 8 | Lorazepam + Alprazolam + Olanzapine |
| P34 | Chronic | 5 | Sodium valproate + Fluoxetine |
| P35 | Chronic | 8 | Biperiden + Risperidone + Fluphenazine |
| P36 | Chronic | 6 | Carbamazepine |
| P37 | Chronic | 15 | Sodium valproate + Risperidone + Nortrilen +Trihexyphenidyl |
| P38 | Chronic | 13 | Risperidone + Quetiapine +Biperiden |
| P39 | Chronic | 8 | Risperidone + Chlorpromazine +Oxazepam |
| P40 | Chronic | 4 | Quetiapine + Olanzapine +Losartan |
